# Supplementary material
Source: HighWire-hosted journal article supplement (https://openres.ersjournals.com/content/9/3/00518-2022)

## Online supplementary material

### Smartphone-based cough monitoring as a near real-time digital pneumonia biomarker

Maximilian Boesch, Frank Rassouli, Florent Baty, Anja Schwärzler, Sandra Widmer, Peter Tinschert, Iris Shih, David Cleres, Filipe Barata, Elgar Fleisch, Martin H. Brutsche

**Supplemental Figure 1. Biomarker development analysis.** Different time units of cough counts were analyzed for their association with established a) clinical and b) laboratory markers of pneumonia disease activity. For both the ROX index and CRP – reflecting oxygenation and inflammation, respectively – the strongest statistical association was observed for a 1 hour time resolution (highlighted in red), leading us to focus our analyses on hourly cough counts.

*Abbreviations used: CRP, C-reactive protein.*

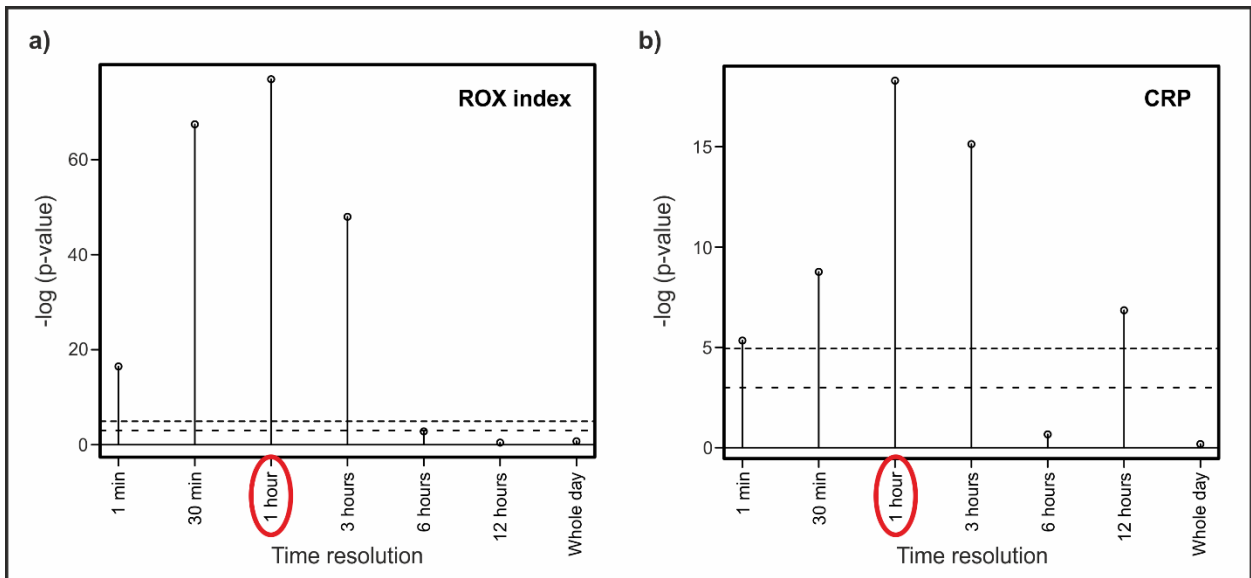

**Supplemental Figure 2. Individual cough trajectories.** Shown are time-resolved coughing data for all 44 study subjects over the length of their individual hospital stays. Cough was continuously monitored and is shown as the number of coughs per 6 hours. The 6 hour intervals relate to the actual starting time point of cough monitoring and may therefore be misaligned with individual calendar days.

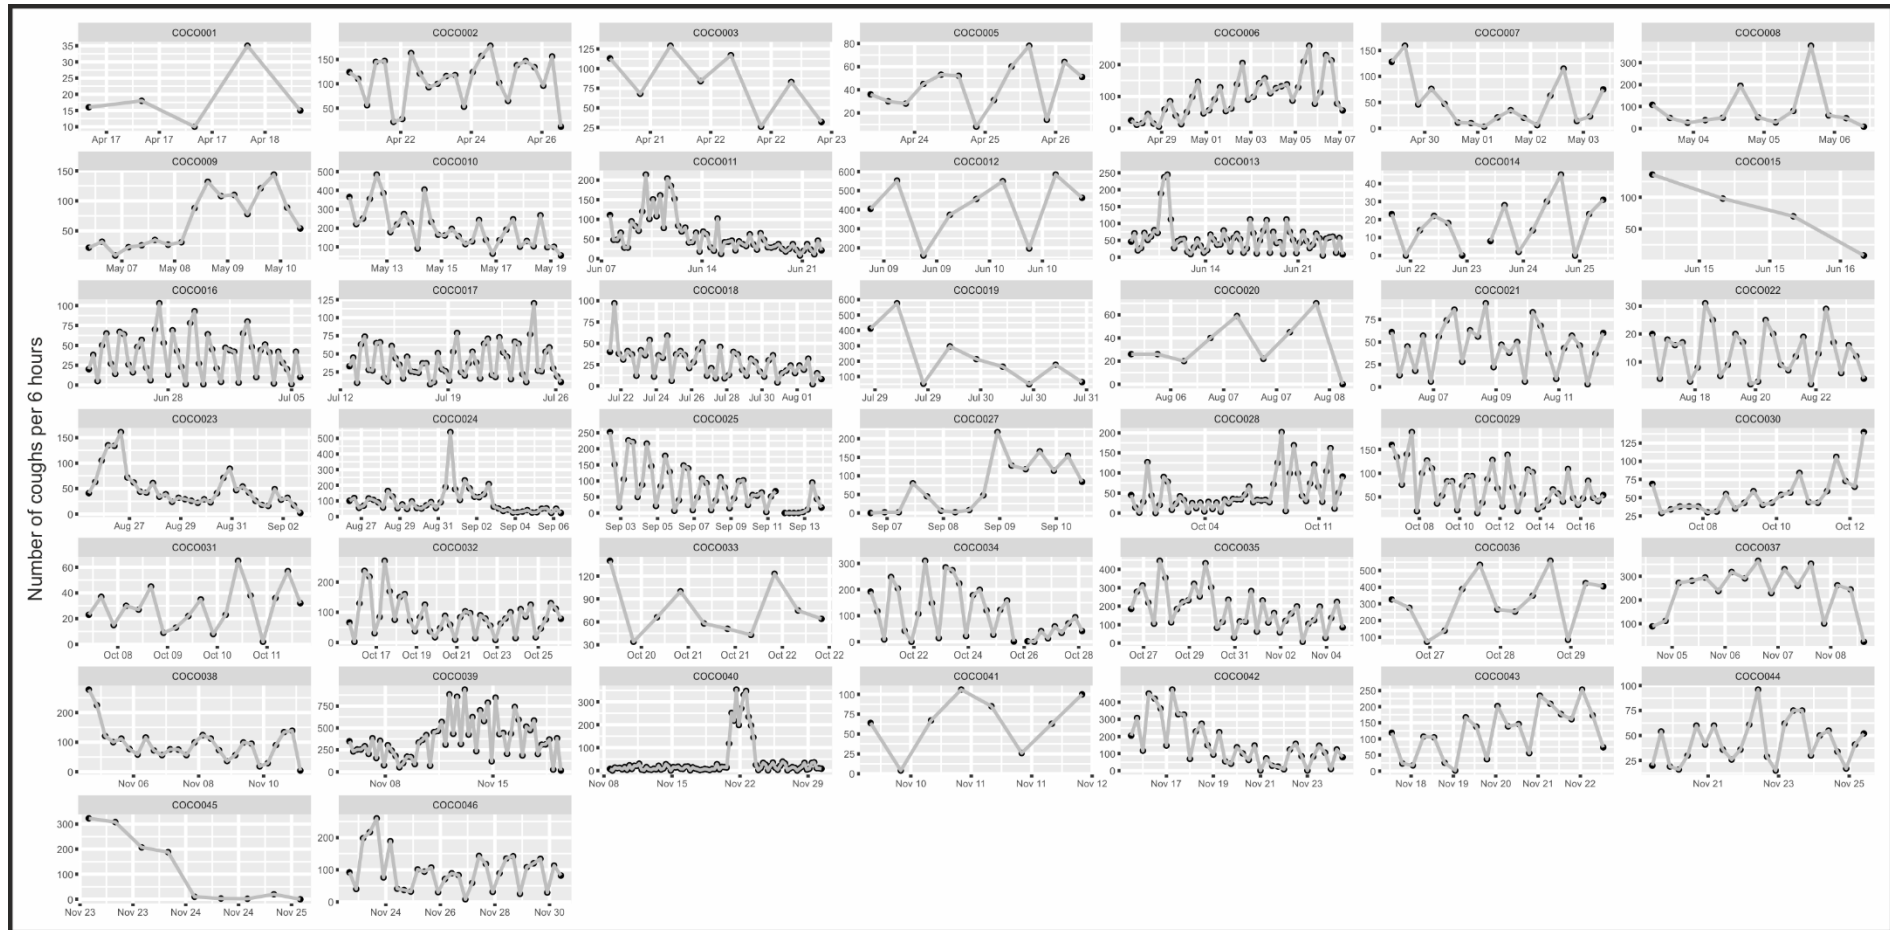

Supplement: inline-supplementary-material-1 [file inline-supplementary-material-1.pdf]
